# Supplementary material for: Oxaliplatin reacts with DMSO only in the presence of water
Source: PubMed Central journal article supplement (PMC9272996; doi:10.1039/c7dt01628j), 2017-06-27
Supplement: DT-046-C7DT01628J-s001.pdf [file DT-046-C7DT01628J-s001.pdf]

## **Supplementary information**

### Oxaliplatin reacts with DMSO only in the presence of water

Hristo P. Varbanov<sup>\*a,b</sup>, Daniel Ortiz<sup>a</sup>, Doris Höfer<sup>b</sup>, Laure Menin<sup>a</sup>, Mathea S. Galanski<sup>b</sup>, Bernhard K. Keppler<sup>b</sup>, Paul J. Dyson<sup>\*a</sup>

<sup>a</sup> Institut des Sciences et Ingénierie Chimiques, Ecole Polytechnique Fédérale de Lausanne (EPFL),

Lausanne, Switzerland. E-mail: paul.dyson@epfl.ch

<sup>b</sup> Institute of Inorganic Chemistry, University of Vienna, Waehringer Strasse 42, A-1090 Vienna, Austria.

E-mail: hristo.varbanov@univie.ac.at

## Contents

|          |                                                                                                                                                                                  |
|----------|----------------------------------------------------------------------------------------------------------------------------------------------------------------------------------|
| Page S3  | Experimental section                                                                                                                                                             |
| Page S4  | Figure S1 with $^1\text{H}$ NMR of cisplatin, carboplatin and oxaliplatin in $\text{DMSO-}d_6$                                                                                   |
| Page S5  | Figure S2 with time dependent interactions between cisplatin and DMSO as measured by ESI MS                                                                                      |
| Page S6  | Figure S3 with selected MS peaks related to oxaliplatin-DMSO adducts                                                                                                             |
| Page S7  | Figure S4 with time dependent interactions between oxaliplatin and DMSO in aq. media                                                                                             |
| Page S7  | Figure S5 with RP-HPLC-MS chromatogram of oxaliplatin after incubation in $\text{H}_2\text{O}/\text{DMSO}$ for 24 h                                                              |
| Page S8  | Figure S6 with RP-HPLC chromatograms of oxaliplatin incubated in $\text{H}_2\text{O}/\text{DMSO}$ and $\text{PBS}/\text{DMSO}$ mixtures                                          |
| Page S9  | Figure S7 with $^1\text{H}$ NMR of carboplatin in $\text{D}_2\text{O}/\text{DMSO-}d_6$ mixtures                                                                                  |
| Page S9  | Figure S8 with selected MS peaks related to carboplatin-DMSO adducts                                                                                                             |
| Page S10 | Figure S9 with RP-HPLC-MS chromatogram of carboplatin after incubation in $\text{H}_2\text{O}/\text{DMSO}$ for 40 h                                                              |
| Page S11 | Table S1 with main peaks observed in the ESI MS spectra during the experiments                                                                                                   |
| Page S12 | Figure S10 with time course of formation of different species during incubation of oxaliplatin in $\text{D}_2\text{O}/\text{DMSO-}d_6$ (10:1) as measured by $^{13}\text{C}$ NMR |
| Page S13 | Figure S11 with $^{13}\text{C}$ and $^{195}\text{Pt}$ NMR spectra of oxaliplatin stored in $\text{H}_2\text{O}/\text{DMSO-}d_6$ after addition of NaCl                           |
| Page S14 | Figure S12 with scheme summarizing the possible reactions that take place with oxaliplatin in DMSO, water and DMSO/water mixtures.                                               |

## Experimental section

Cisplatin, carboplatin and oxaliplatin were prepared according to standard literature procedures.<sup>1-</sup><sup>3</sup> The synthesis and NMR spectroscopic characterization of [Pt(*trans*-<sup>15</sup>N<sub>2</sub>-DACH)(<sup>13</sup>C<sub>2</sub>)oxalate] is reported in ref<sup>4</sup>. High purity water was obtained from a Milli-Q water system (18.2 MΩ cm, Milli-Q, Merck). All other reagents and solvents were purchased from commercial suppliers and were used as received.

<sup>1</sup>H NMR spectra were recorded on a Bruker Avance 400 (400 MHz) or a Bruker Avance III 500 (500 MHz) spectrometers; <sup>13</sup>C, <sup>195</sup>Pt and 2D NMR spectra were recorded with a Bruker Avance III 500 MHz spectrometer at 500.32 (<sup>1</sup>H), 125.81 (<sup>13</sup>C) and 107.55 MHz (<sup>195</sup>Pt). Pt complexes (c ≈ 10 mM) were dissolved in DMSO-d<sub>6</sub>, D<sub>2</sub>O, DMSO-d<sub>6</sub>/H<sub>2</sub>O (1:1) and D<sub>2</sub>O/DMSO-d<sub>6</sub> mixtures with DMSO-d<sub>6</sub> content between 1 to 10%, as well as 90%. NMR spectra were recorded at room temperature (25 °C) over a period of 24 h to a few days.

Mass spectrometry was performed on a LTQ Orbitrap FTMS instrument (LTQ Orbitrap Elite FTMS, Thermo Scientific, Bremen, Germany) operated in the positive mode coupled with a robotic chip-based nano-ESI source (TriVersa Nanomate, Advion Biosciences, Ithaca, NY, U.S.A.). A standard data acquisition and instrument control system was utilized (Thermo Scientific), whereas the ion source was controlled by Chipsoft 8.3.1 software (Advion BioScience). Samples were loaded onto a 96-well plate (Eppendorf, Hamburg, Germany) with an injection volume of 5 μL. The experimental conditions for the ionization voltage was +1.4 kV and the gas pressure was set at 0.30 psi. The temperature of ion transfer capillary was 275 °C. The automatic gain control (AGC) target was set to 1x10<sup>6</sup> and the different spectra were obtained in the 80-1000 *m/z* range in the reduce profile mode with a resolution set to 120,000. In all spectra one microscan was acquired with a maximum injection time value of 1000 ms. Data were analyzed using XCalibur (Thermo Scientific) and MS tools available at <http://ms.cheminfo.org>.

RP-HPLC measurements were performed on an Ultimate 3000 Dionex system controlled by a Chromeleon 6.80 software. Carboplatin and oxaliplatin (c ≈ 1 mM) were incubated in water, water + 1% DMSO, PBS (pH = 7.4) and PBS (pH = 7.4) + 1% DMSO at 25 °C for 24 h. HPLC measurements were performed immediately after dissolving and after 2, 5 and 24 hours applying the following chromatographic conditions: a reversed phase Acquity BEH C18 column (3.0 x 50 mm, 1.7 μm) from Waters as stationary phase, column temperature 25 °C, gradient eluent

condition with MeOH and 0.1% (v/v) FA (0-5 min, 5% MeOH, 5-8 min, 90% MeOH), flow rate 0.4 mL/min, injection volume 2  $\mu$ L, UV-vis detection at 210, 225, 250 and 300 nm. For some of the experiments, HPLC was coupled also to Advion expressionL CMS mass spectrometer (ESI ion source).

## Figures and tables

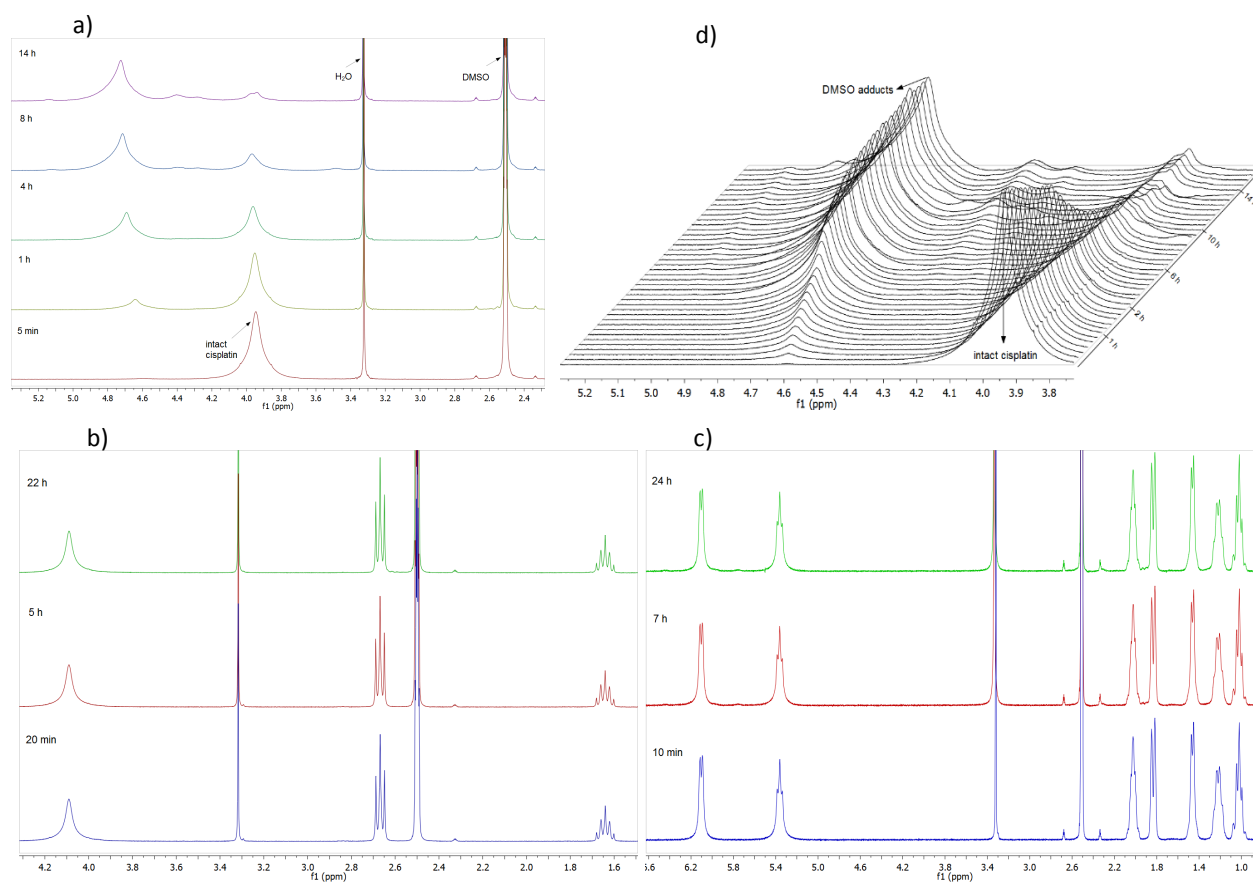

**Fig. S1**  $^1\text{H}$  NMR spectra of cisplatin (a), carboplatin (b) and oxaliplatin (c) in  $\text{DMSO-d}_6$  after different periods of incubation at RT. The change of intensity of the  $\text{NH}_3$  signal in the  $^1\text{H}$  NMR spectra of cisplatin in  $\text{DMSO-d}_6$ , as well as the appearance of new products in solution as a function of time is shown in (d).

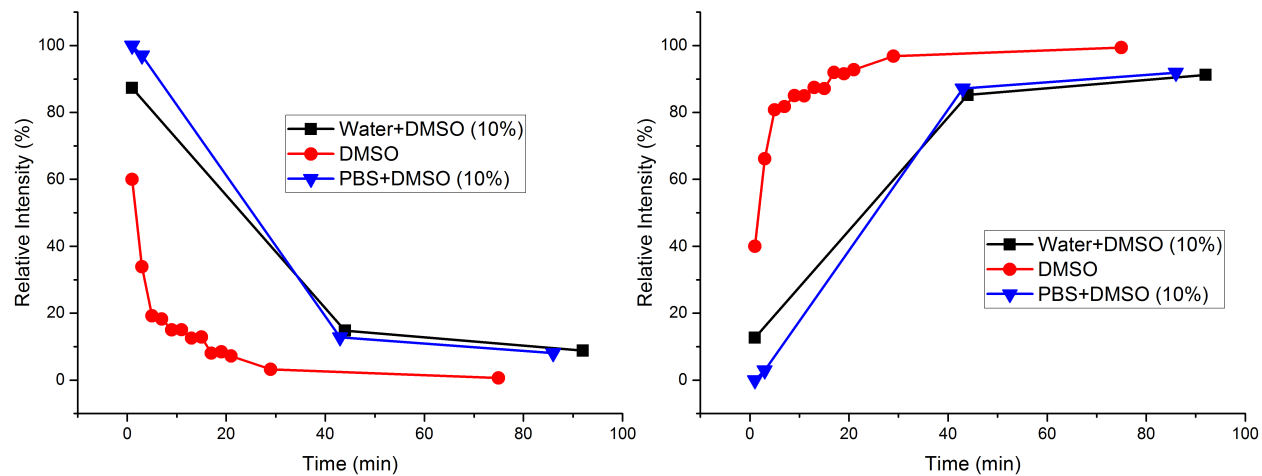

**Fig. S2** Rate of consumption of cisplatin (a) and formation of  $[\text{Pt}(\text{NH}_3)_2\text{Cl}(\text{DMSO})]^+$  (b) in pure DMSO, clinical formulation (3.3 mM in 0.9 % saline), diluted with water/DMSO (10:1) or with PBS (pH = 7.4)/DMSO (10:1). Aliquots from the respective solutions were taken at different time intervals, further diluted with a MeOH/water (1:10) mixture and measured by ESI MS.

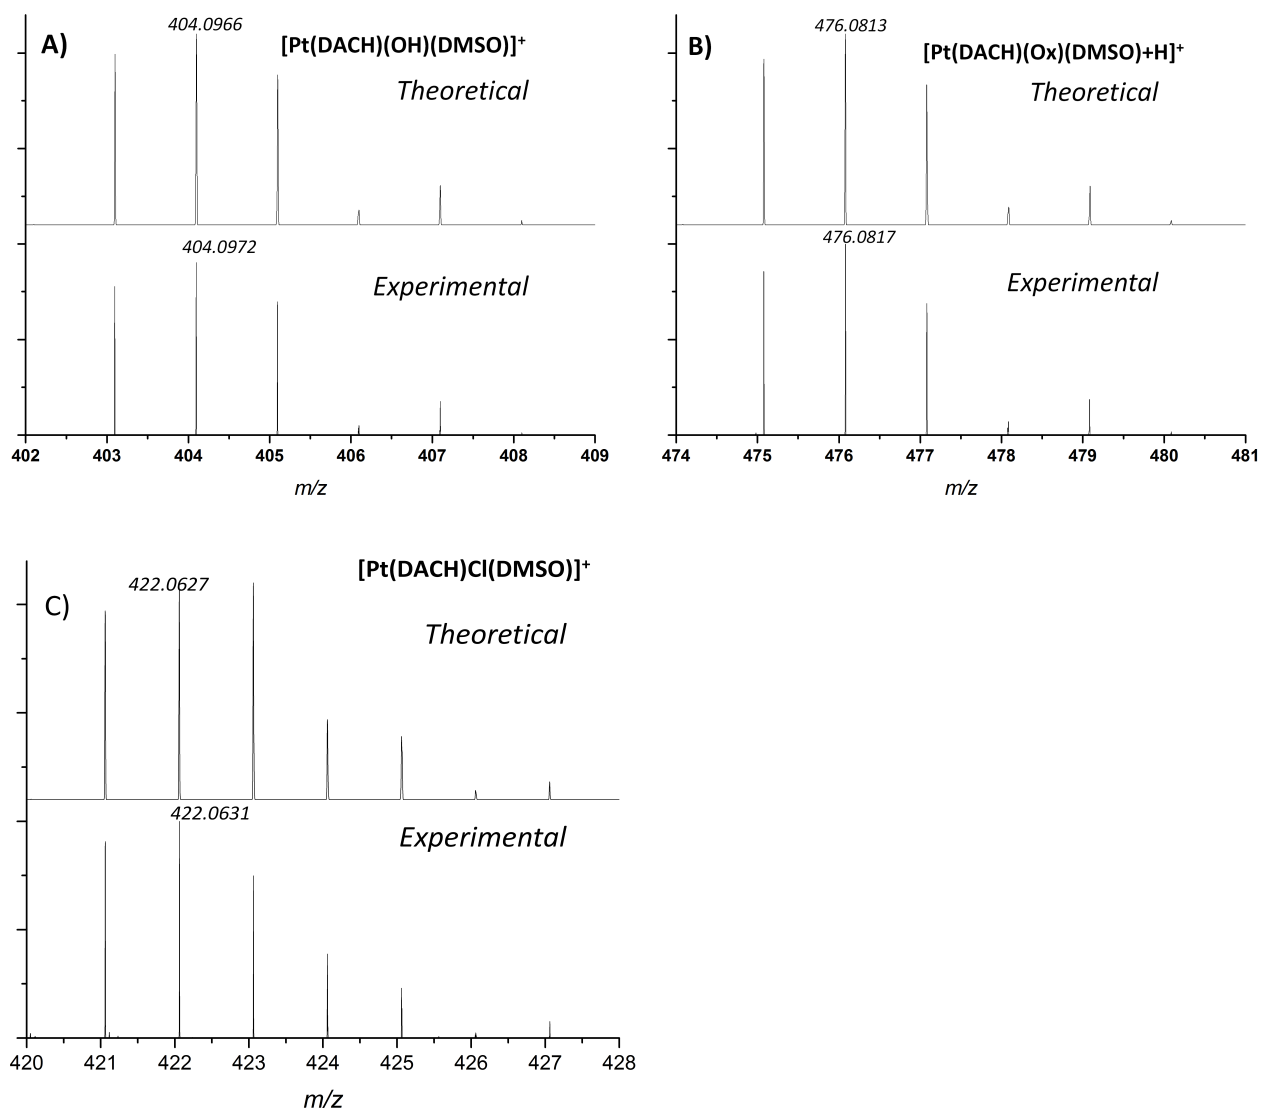

**Fig. S3** Selected peaks of oxaliplatin-DMSO adducts observed in the ESI<sup>+</sup> mass spectra of oxaliplatin after 10 h of incubation in a water/DMSO (10:1) mixture (A, B) and a PBS (pH = 7.4)/DMSO (100:1) mixture (C); experimental spectrum vs simulated isotopic patterns for  $[\text{Pt}(\text{DACH})(\text{OH})(\text{DMSO})]^+$  (A),  $[\text{Pt}(\text{DACH})(\text{Ox})(\text{DMSO})+\text{H}]^+$  (B) and  $[\text{Pt}(\text{DACH})\text{Cl}(\text{DMSO})]^+$  (C) are shown.

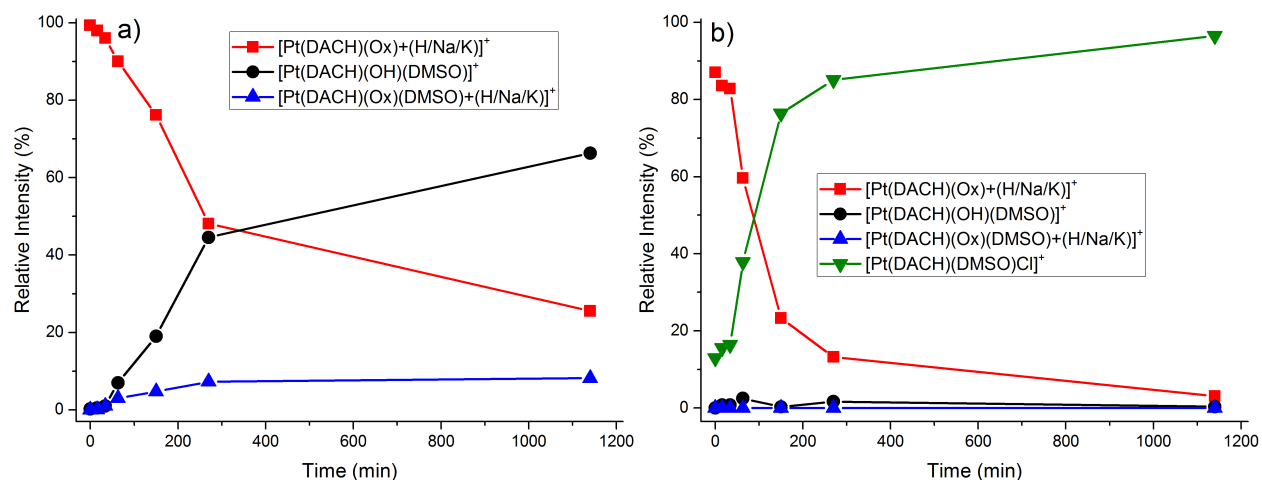

**Fig. S4** Time-dependent change in the relative abundance of different species formed in the clinical formulation of oxaliplatin (12.6 mM in 5% glucose solution) after dilution with a) water/DMSO (100:1) or b) PBS (pH = 7.4)/DMSO (100:1) mixtures. Aliquots from the solutions were taken at different time intervals, diluted with MeOH/water and ESI MS were recorded in positive mode.

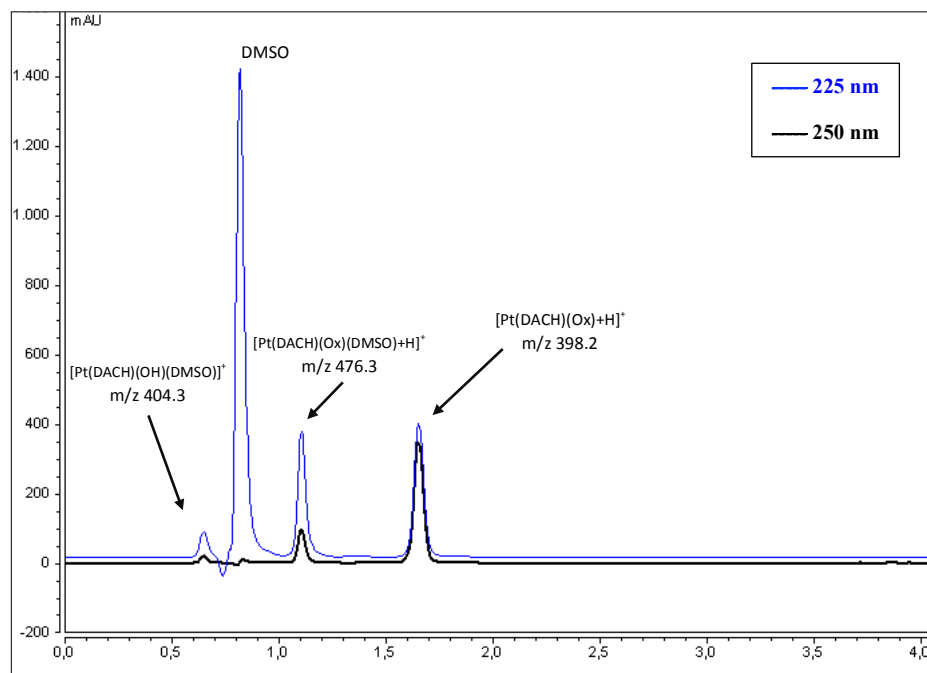

**Fig. S5** RP-HPLC-MS chromatogram of oxaliplatin after incubation in water/DMSO (100:1) mixture at 25 °C for 24 h. Overlay of the chromatograms recorded at 225 nm and 250 nm wavelength with the  $m/z$  values detected for the respective peaks in the MS spectra is shown.

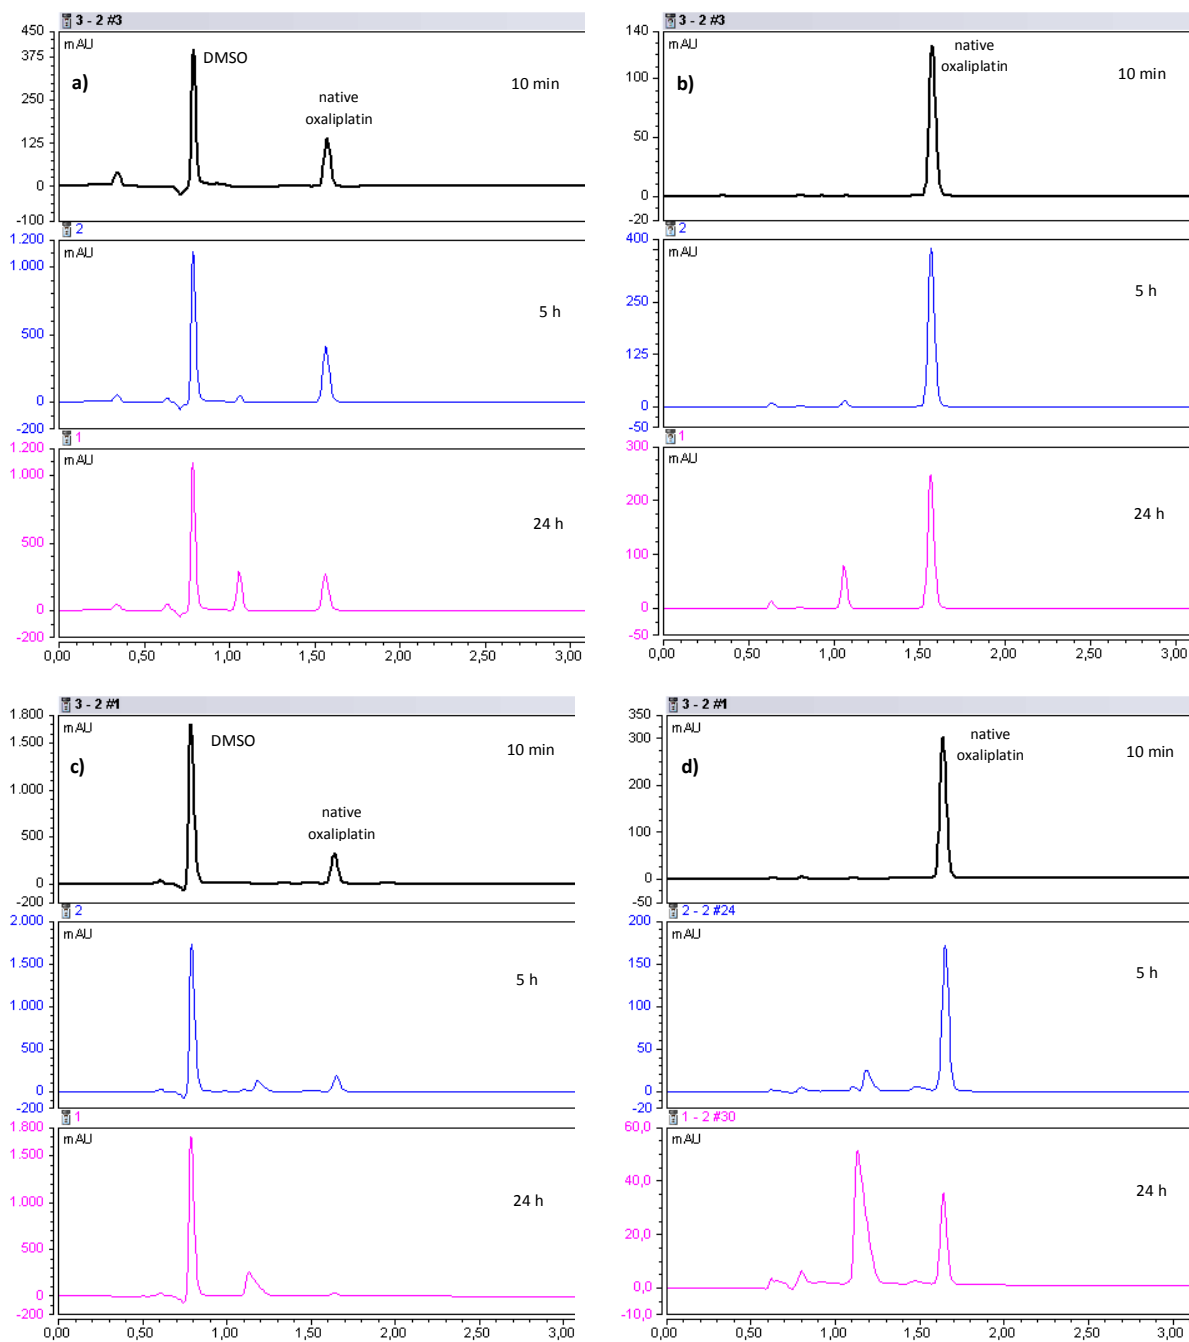

**Fig. S6** RP-HPLC chromatograms of oxaliplatin (eluted at 1.6 min) after incubation in water/DMSO (100:1) (a, b) and PBS/DMSO (100:1) (c, d) mixtures at 25 °C for 10 min, 5 h and 24 h; UV detection at 225 nm (a, c) and 250 nm (b, d). The decrease of the amount of oxaliplatin after incubation for 24 h was calculated as 46% in water/DMSO and 90% in PBS/DMSO at 225 nm detection wavelength (the respective values were 22% and 75% at 250 nm, respectively). Oxaliplatin is stable in pure water over 24 h whereas < 60% of native oxaliplatin can be found in pure PBS (pH = 7.4) after the same incubation time (data not shown).



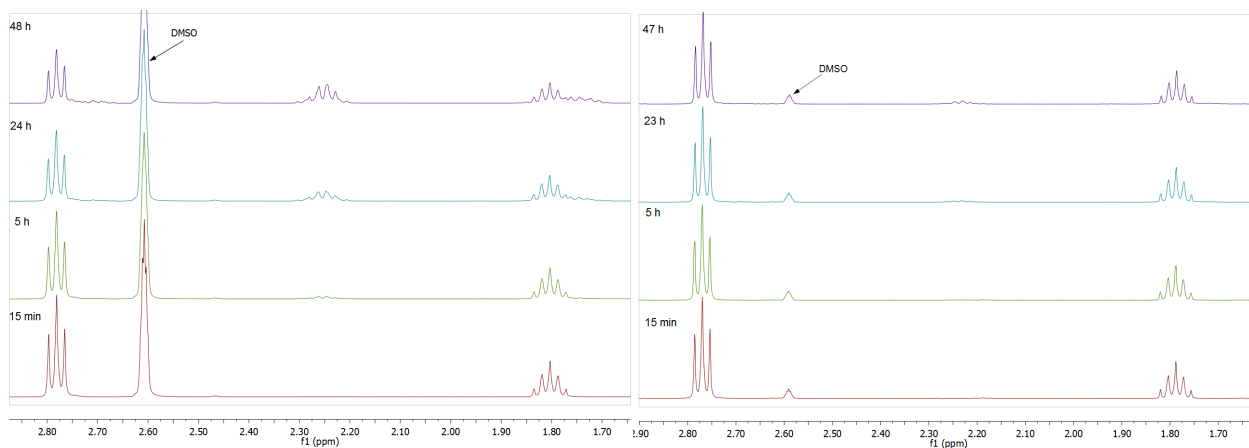

**Fig. S7**  $^1\text{H}$  NMR spectra of carboplatin in  $\text{D}_2\text{O}/\text{DMSO-d}_6$  mixtures (left, 10:1; right 100:1) after different periods of incubation at RT.

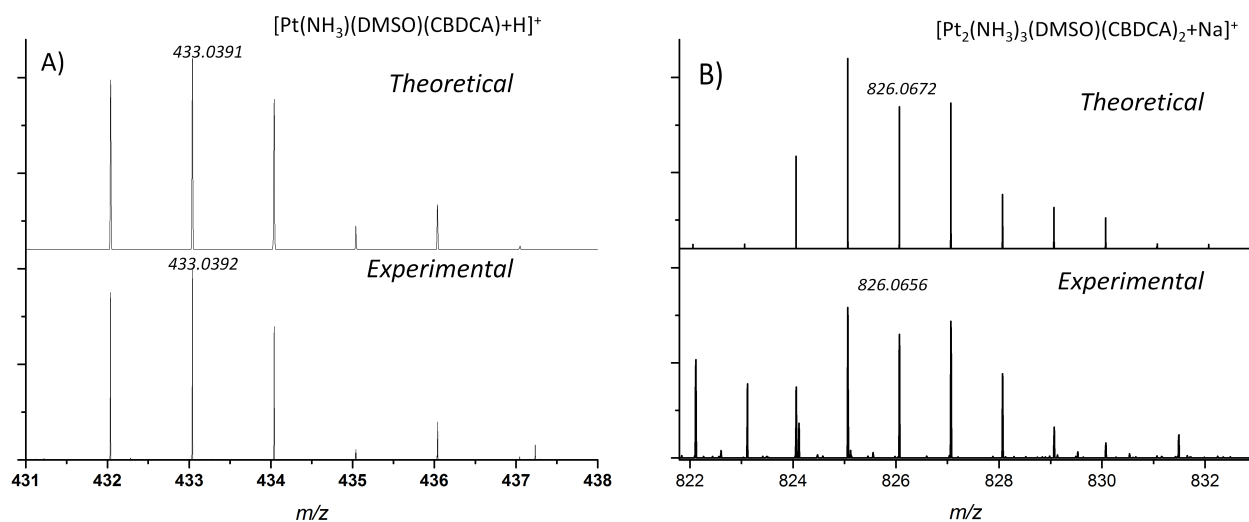

**Fig. S8** Selected peaks related to carboplatin-DMSO adducts  $[\text{Pt}(\text{NH}_3)(\text{DMSO})(\text{CBDCA})+\text{H}]^+$  (left) and  $[\text{Pt}_2(\text{NH}_3)_3(\text{DMSO})(\text{CBDCA})_2+\text{Na}]^+$  (right) observed in the ESI+ mass spectrum of carboplatin after 24 h of incubation in water/DMSO (10:1) mixture; experimental spectrum vs simulated isotopic patterns are shown.

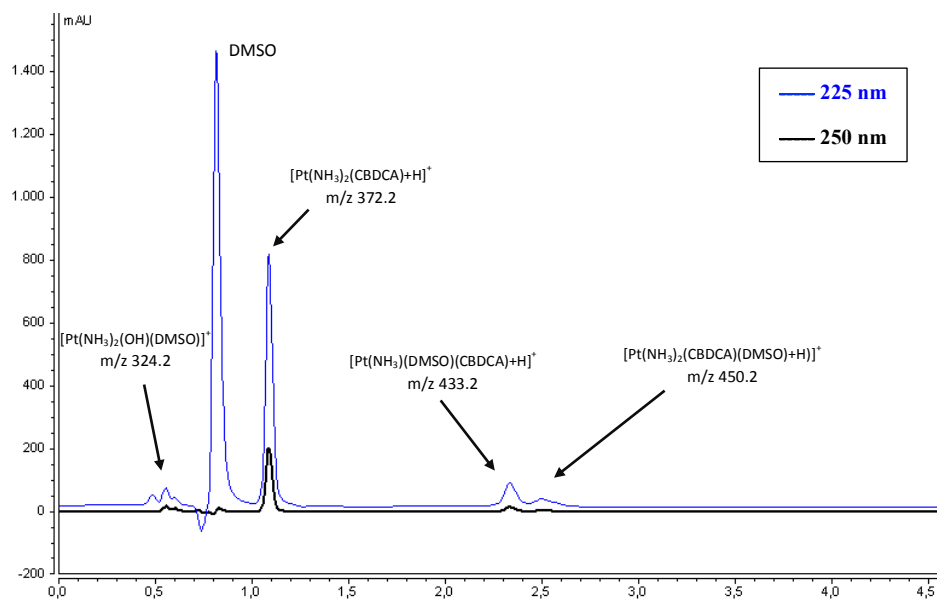

**Fig. S9** RP-HPLC-MS chromatogram of carboplatin after incubation in a water/DMSO (100:1) mixture at 25 °C for 40 h. Overlay of the chromatograms recorded at 225 nm and 250 nm wavelength with the  $m/z$  values detected for the respective peaks in the MS spectra is shown.

**Table S1** Main peaks observed in ESI+ mass spectra during the time dependent experiments with the clinical formulations of cisplatin (3.3 mM in 0.9% saline), carboplatin (27 mM in 5% glucose solution) and oxaliplatin (12.6% in 5% glucose solution) diluted with water/DMSO or PBS/DMSO mixtures. Observed/theoretical masses are given for the monoisotopic peaks.

| Molecular species                      | Formula                        | Observed mass | Theoretical mass | Error (ppm) |
|----------------------------------------|--------------------------------|---------------|------------------|-------------|
| <b>Cisplatin</b>                       |                                |               |                  |             |
| $[Pt(NH_3)_2Cl_2+H]^+$                 | $H_7Cl_2N_2Pt$                 | 299.9624      | 299.9629         | 1.6         |
| $[Pt(NH_3)_2Cl_2+Na]^+$                | $H_6Cl_2N_2PtNa$               | 321.9448      | 321.9449         | 0.3         |
| $[Pt(NH_3)_2Cl_2+K]^+$                 | $H_6Cl_2N_2PtK$                | 337.9189      | 337.9187         | 0.6         |
| $[Pt(NH_3)_2(Cl)(DMSO)]^+$             | $C_2H_{12}ClN_2OPtS$           | 342.0002      | 342.0001         | 0.3         |
| $*[Pt(NH_3)_2(OH)(DMSO)]^+$            | $C_2H_{13}N_2O_2PtS$           | 324.0339      | 324.0340         | 0.3         |
| $*[Pt(NH_3)(Cl)(DMSO)_2]^+$            | $C_4H_{15}ClNO_2PtS_2$         | 402.9873      | 402.9875         | 0.5         |
| <b>Carboplatin</b>                     |                                |               |                  |             |
| $[Pt(NH_3)_2(CBDCA)+H]^+$              | $C_6H_{13}N_2O_4Pt$            | 372.0520      | 372.0523         | 0.8         |
| $[Pt(NH_3)_2(CBDCA)+Na]^+$             | $C_6H_{12}N_2O_4PtNa$          | 394.0339      | 394.0343         | 1.0         |
| $[Pt(NH_3)_2(CBDCA)+K]^+$              | $C_6H_{12}N_2O_4PtK$           | 410.0076      | 410.0082         | 1.5         |
| $[Pt(NH_3)_2(CBDCA)(DMSO)+H]^+$        | $C_8H_{19}N_2O_5PtS$           | 450.0664      | 450.0657         | 1.5         |
| $[Pt(NH_3)_2(CBDCA)(DMSO)+Na]^+$       | $C_8H_{18}N_2O_5PtSNa$         | 472.0483      | 472.0476         | 1.5         |
| $[Pt(NH_3)(DMSO)(CBDCA)+H]^+$          | $C_8H_{16}NO_5PtS$             | 433.0393      | 433.0391         | 0.5         |
| $[Pt(NH_3)(DMSO)(CBDCA)+Na]^+$         | $C_8H_{15}NO_5PtSNa$           | 455.0218      | 455.0211         | 1.1         |
| $*[Pt(NH_3)(CBDCA)(DMSO)_2+Na]^+$      | $C_{10}H_{21}NO_6PtS_2Na$      | 533.0337      | 533.0335         | 0.8         |
| $*[Pt(NH_3)_2(OH)(DMSO)]^+$            | $C_2H_{13}N_2O_2PtS$           | 324.0339      | 324.0340         | 0.3         |
| $[Pt_2(NH_3)_4(CBDCA)_2+H]^+$          | $C_{12}H_{25}N_4O_8Pt_2$       | 743.0973      | 743.0962         | 1.4         |
| $[Pt_2(NH_3)_4(CBDCA)_2+Na]^+$         | $C_{12}H_{24}N_4O_8Pt_2Na$     | 765.0794      | 765.0782         | 1.5         |
| $[Pt_2(NH_3)_3(DMSO)(CBDCA)_2+H]^+$    | $C_{14}H_{28}N_3O_9Pt_2S$      | 804.0851      | 804.0836         | 1.8         |
| $[Pt_2(NH_3)_3(DMSO)(CBDCA)_2+Na]^+$   | $C_{14}H_{27}N_3O_9Pt_2SNa$    | 826.0672      | 826.0656         | 1.9         |
| $*[Pt_2(NH_3)_3(DMSO)(CBDCA)_2+K]^+$   | $C_{14}H_{27}N_3O_9Pt_2SK$     | 842.0413      | 842.0395         | 2.1         |
| $*[Pt_2(NH_3)_2(DMSO)_2(CBDCA)_2+H]^+$ | $C_{16}H_{31}N_2O_{10}Pt_2S_2$ | 865.0735      | 865.0711         | 2.7         |
| $*[Pt_2(NH_3)_4(OH)(DMSO)(CBDCA)]^+$   | $C_8H_{25}N_4O_6Pt_2S$         | 695.0791      | 695.0785         | 0.9         |
| <b>Oxaliplatin</b>                     |                                |               |                  |             |
| $[Pt(DACH)(Ox)+H]^+$                   | $C_8H_{15}N_2O_4Pt$            | 398.0680      | 398.0678         | 0.5         |
| $[Pt(DACH)(Ox)+Na]^+$                  | $C_8H_{14}N_2O_4PtNa$          | 420.0500      | 420.0499         | 0.2         |
| $[Pt(DACH)(Ox)+K]^+$                   | $C_8H_{14}N_2O_4PtK$           | 436.0239      | 436.0238         | 0.2         |
| $[Pt(DACH)(OH)(DMSO)]^+$               | $C_8H_{21}N_2O_2PtS$           | 404.0972      | 404.0966         | 1.4         |
| $*[Pt(DACH)(OH)(DMSO)-H+Na]^+$         | $C_8H_{20}N_2O_2PtSNa$         | 426.0791      | 426.0785         | 1.4         |
| $[Pt(DACH)(Ox)(DMSO)+H]^+$             | $C_{10}H_{21}N_2O_5PtS$        | 476.0817      | 476.0813         | 0.9         |
| $[Pt(DACH)(Ox)(DMSO)+Na]^+$            | $C_{10}H_{20}N_2O_5PtSNa$      | 498.0635      | 498.0633         | 0.6         |
| $*[Pt(DACH)(Ox)(DMSO)+K]^+$            | $C_{10}H_{20}N_2O_5PtSK$       | 514.0373      | 514.0372         | 0.5         |
| $[Pt(DACH)Cl(DMSO)]^+$                 | $C_8H_{20}N_2OPtSCl$           | 422.0631      | 422.0627         | 0.9         |

\* trace amounts.

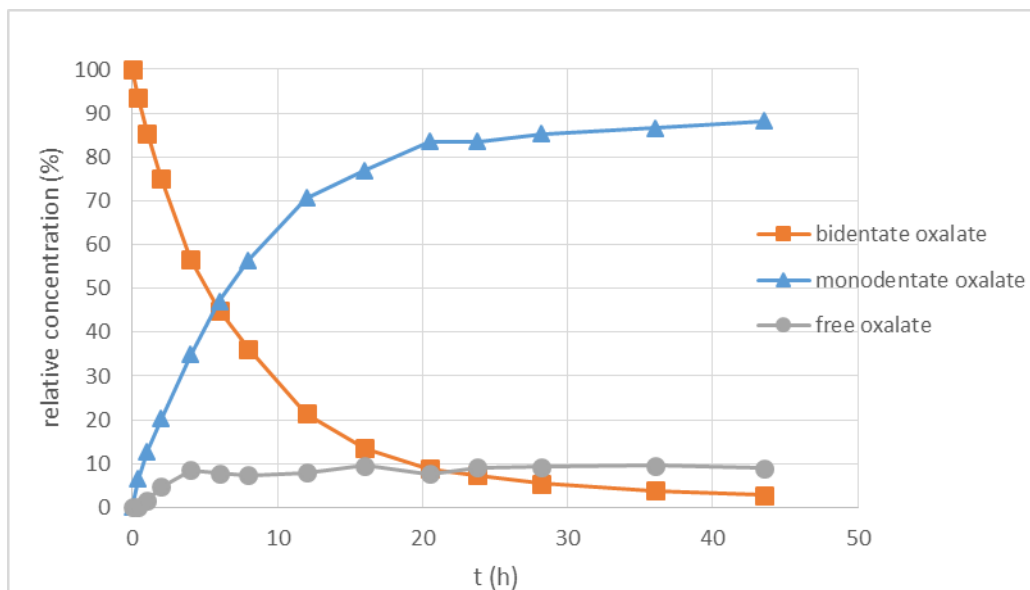

**Fig. S10** Time course of formation of different species during the incubation of the oxaliplatin analogue featuring  $^{13}\text{C}$ -labeled oxalate in a water/DMSO (10:1) mixture as followed by  $^{13}\text{C}$  NMR spectroscopy; bidentately coordinated oxalate in intact oxaliplatin (■), monodentately coordinated oxalate in  $[\text{Pt}(\text{DACH})(\text{Ox})(\text{DMSO})]$  (▲) and free oxalate (●), corresponding to formation of  $[\text{Pt}(\text{DACH})(\text{OH})(\text{DMSO})]^+$ .

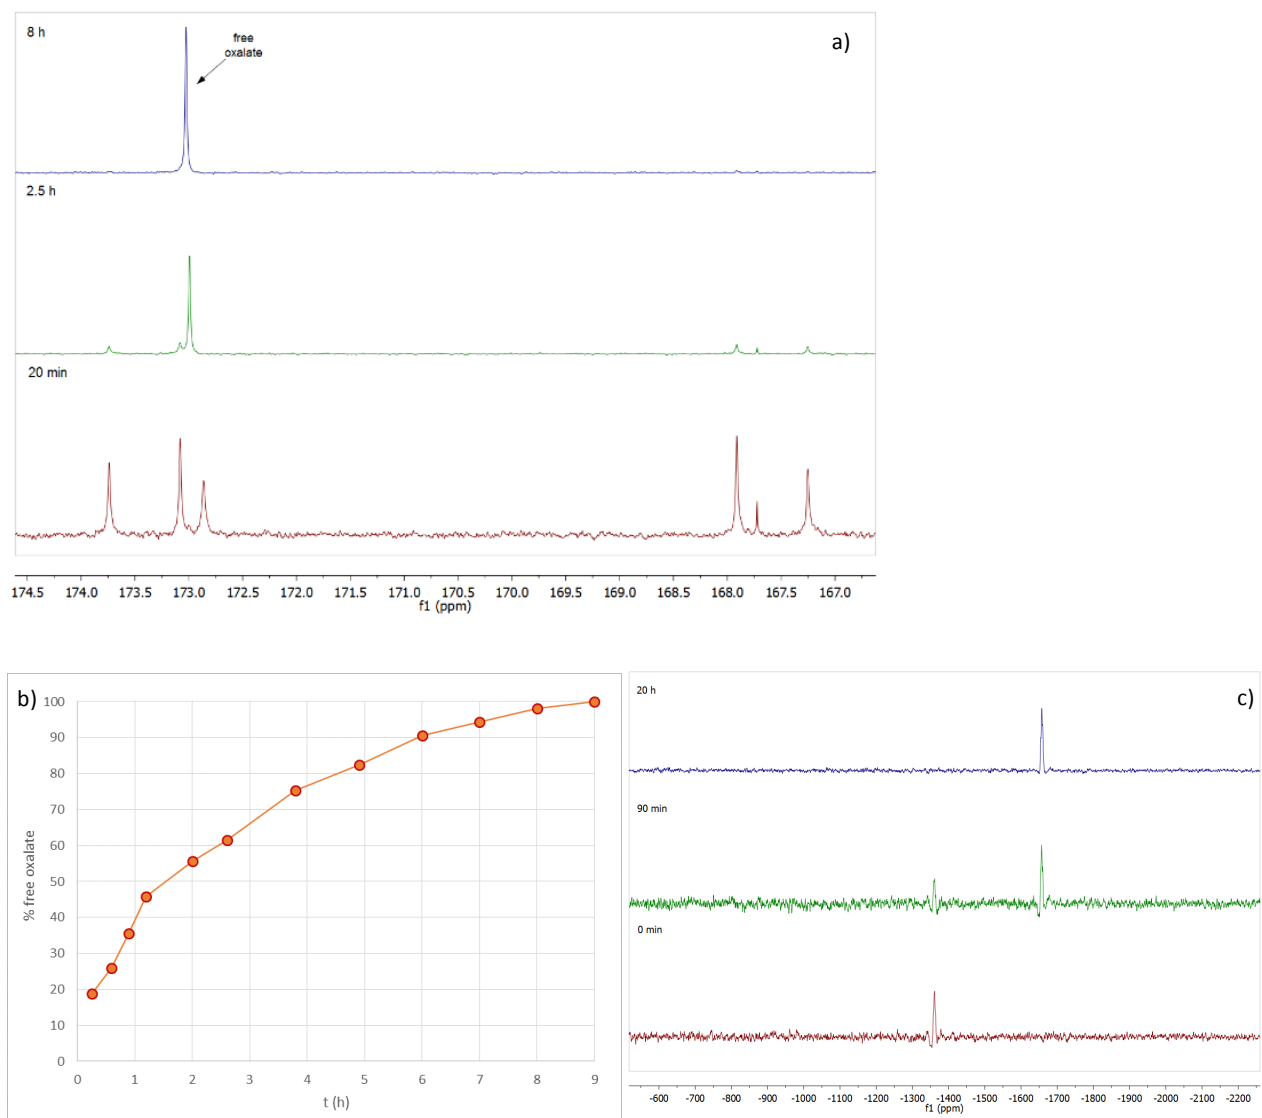

**Fig. S11 a)**  $^{13}\text{C}$  NMR of oxaliplatin analogue with  $^{13}\text{C}$ -labeled oxalate stored in  $\text{H}_2\text{O}/\text{DMSO-d}_6$  (1:1) for 4 days at RT after addition of NaCl (5 eq.). **b)** Increase of non-coordinated oxalate formed after the addition of NaCl, determined by  $^{13}\text{C}$  NMR spectroscopy. **c)**  $^{195}\text{Pt}$  NMR recorded before (point 0), 90 min and 20 h after the addition of NaCl (5 eq.);  $^{195}\text{Pt}$  chemical shifts (-1657 ppm and -1361 ppm) were referenced relative to external  $\text{K}_2[\text{PtCl}_4]$ .

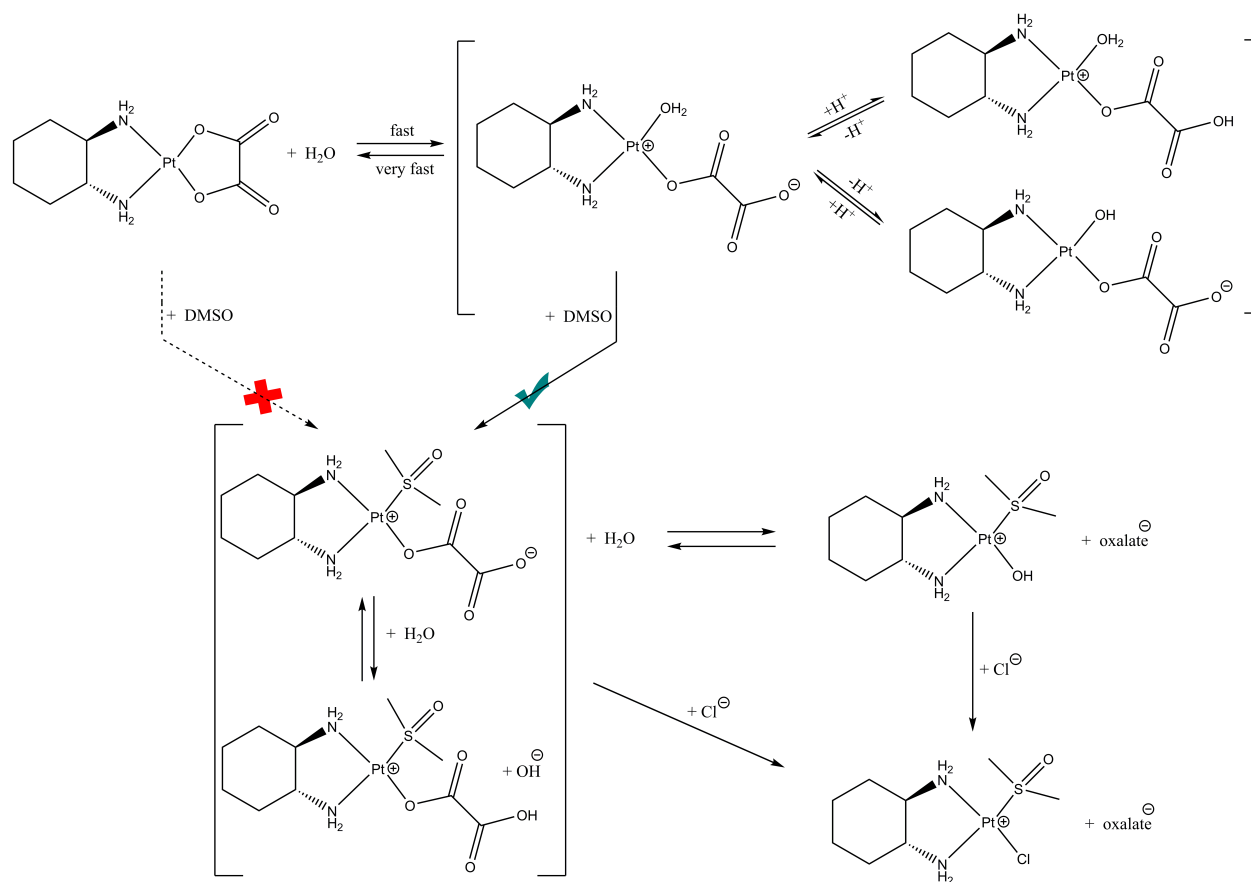

**Fig. S12** Scheme summarizing the possible reactions that take place with oxaliplatin in DMSO, water and DMSO/water mixtures. Formation of  $[\text{Pt}(\text{DACH})\text{Cl}(\text{DMSO})]^+$  after addition of NaCl is also noted.

## References

- (1) S. C. Dhara, *Indian J. Chem.*, **1970**, 193–194.
- (2) H. P. Varbanov, S.M. Valiahd, C.R. Kowol, M.A. Jakupec, M. Galanski, B.K. Keppler, *Dalton Trans.*, 2012, **41**, 14404-14415.
- (3) L. Habala, M. Galanski, A. Yasemi, A.A. Nazarov, N.G. von Keyserlingk, B.K. Keppler, *Eur. J. Med. Chem.*, 2005, **40**, 1149–1155.
- (4) D. Höfer, M. Galanski, B.K. Keppler, *Eur. J. Inorg. Chem.*, 2017, **17**, 2347-2354.
